# Supplementary material for: Formation and sorption of trihalomethanes from cross-linked polyethylene pipes following chlorinated water exposure
Source: Royal Society of Chemistry journal article supplement (doi:10.1039/d0ew00262c), 2020-01-01
Supplement: d0ew00262c1.pdf [file d0ew00262c1.pdf]

1

2

## Supporting Information for:

3

Formation and Sorption of Trihalomethanes from Cross-

4

Linked Polyethylene Pipes Following Chlorinated Water

5

## Exposure

6

7

*Gaopin Cao,<sup>§</sup> Kun Huang,<sup>§</sup> Andrew J. Whelton,<sup>§,†</sup> and Amisha D. Shah<sup>§,†,\*</sup>*

8

9

10

<sup>§</sup>Lyles School of Civil Engineering, Purdue University, West Lafayette, Indiana, USA

11

<sup>†</sup>Environmental and Ecological Engineering, Purdue University, West Lafayette, Indiana, USA

12

13

\* Corresponding author phone: 765-496-2470; fax: 765-494-0395;

14

E-mail: [adshah@purdue.edu](mailto:adshah@purdue.edu)

15

16

8 Pages

17

5 Figures

18

2 Tables

19

2 Text Sections

20

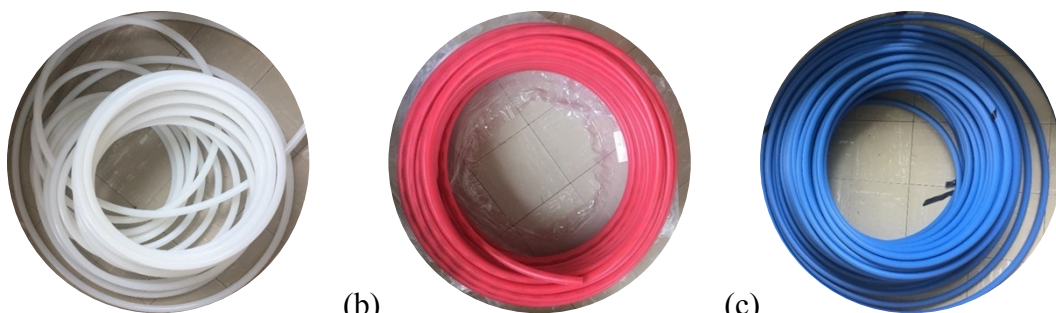

21 (a)

(b)

(c)

22 **Figure S1.** Pictures of pipe coils of (a) PEX-a pipe, (b) PEX-b pipe, and (c) PEX-c pipe.

23

24

25

26 (a)

27

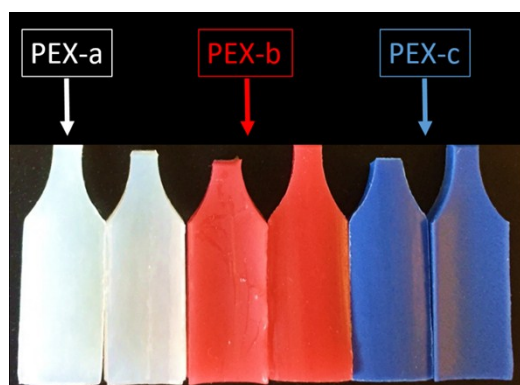

(b)

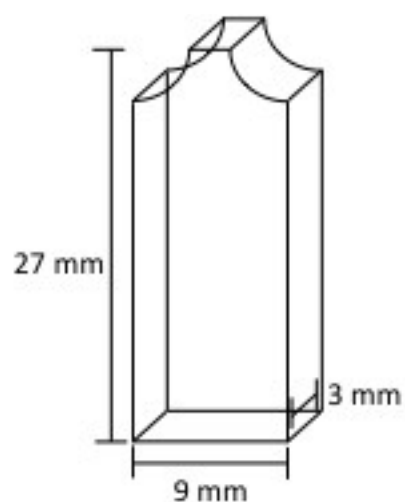

28

29

30 **Figure S2.** The (a) shape and (b) dimensions (length, width, and thickness) of the half-dog-bone  
31 shape pipe pieces.

32

33

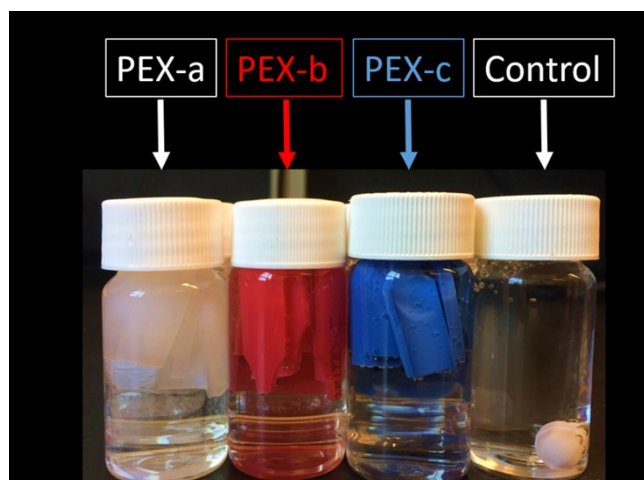

34

35

36 **Figure S3.** Pictures of the reactors used for the sorption experiments.

37  
38

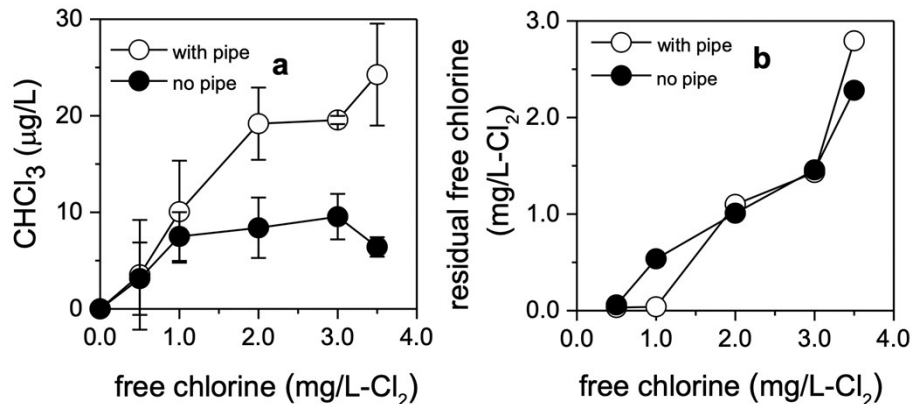

39  
40  
41  
42  
43  
44  
45

**Figure S4.** Effect of the initial free chlorine dose on (a) CHCl<sub>3</sub> formation and (b) the residual free chlorine concentration, after 120 h of free chlorine exposure from the PEX-a pipe (pH 7.3±0.2, [TOC]<sub>0</sub> = 3.2 mg/L-C, FP 1, 22 °C).

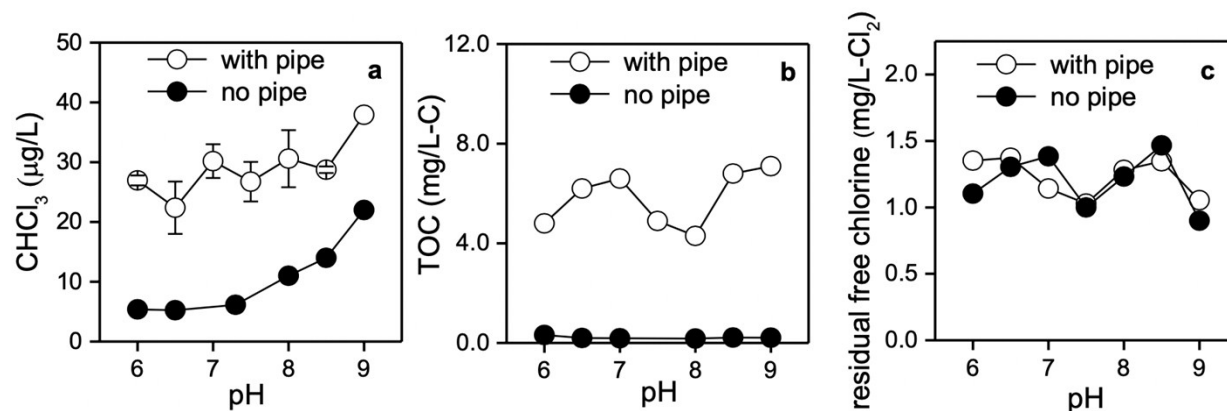

46  
47  
48  
49  
50  
51  
52  
53  
54  
55  
56  
57  
58  
59  
60  
61

**Figure S5.** Effect of varying pH on (a) CHCl<sub>3</sub> formation, (b) TOC leaching and (c) the residual free chlorine after 120 h of chlorination (pH 6.0 to 9.0, 22 °C, [free chlorine]<sub>0</sub> = 2 mg/L-Cl<sub>2</sub>, [Br]<sub>0</sub> = 0 µg/L) from the PEX-a pipe after FP 1 and bottle-only controls.

62 **Table S1.** A summary of the conditions used to assess THM formation from the kinetic and dosage experiments.

63

| Type                | Varied Parameter         | Pipe Type               | Flushing Period | Temperature (°C) | pH        | [Br <sup>-</sup> ] (µg/L) | Free Chlorine Dosage (mg/L – Cl <sub>2</sub> ) | Quenching Times         |
|---------------------|--------------------------|-------------------------|-----------------|------------------|-----------|---------------------------|------------------------------------------------|-------------------------|
| <b>Kinetic</b>      | Pipe Type                | PEX-a<br>PEX-b<br>PEX-c | FP1, FP2, FP3   | 22               | 7.0       | 0                         | 2.0                                            | Periodically over 120 h |
| <b>Kinetic</b>      | Temperature              | PEX-a                   | FP1             | 22 and 55        | 7.0       | 0                         | 2.0                                            | Periodically over 120 h |
| <b>Kinetic</b>      | Temperature with Bromide | PEX-a                   | FP1             | 22 and 55        | 7.0       | 78                        | 2.0                                            | Periodically over 120 h |
| <b>Dosage-based</b> | Temperature              | PEX-a                   | FP1             | 4, 22, and 55    | 7.0       | 0                         | 2.0                                            | After 120 h             |
| <b>Dosage-based</b> | pH                       | PEX-a                   | FP1             | 22               | 6.0 – 9.0 | 0                         | 2.0                                            | After 120 h             |
| <b>Dosage-based</b> | Bromide                  | PEX-a                   | FP1             | 22               | 7.0       | 0 – 195                   | 2.0                                            | After 120 h             |
| <b>Dosage-based</b> | Disinfectant Dose        | PEX-a                   | FP1             | 22               | 7.0       | 0                         | 0 – 3.5                                        | After 120 h             |

65 **Table S2.** Values obtained when evaluating sorption of each THM to each PEX pipe type at 22  
 66 and 55 °C. These values include: (i) k' values obtained when fitting the sorption kinetic model to  
 67 the experimental data to assess THM sorption to PEX at 22 and 55 °C, and (ii) the slope and R<sup>2</sup>  
 68 values for the linear regressions obtained when plotting the log K<sub>d</sub> values with the log K<sub>ow</sub> values.  
 69  
 70

| PEX Type | temperature (°C) | CHCl <sub>3</sub> | CHBrCl <sub>2</sub> | CHBr <sub>2</sub> Cl | CHBr <sub>3</sub> | Linear Regression for K <sub>d</sub><br>(K <sub>d</sub> = slope·K <sub>ow</sub> + b) |                |
|----------|------------------|-------------------|---------------------|----------------------|-------------------|--------------------------------------------------------------------------------------|----------------|
|          |                  | k' (1/h)          | k' (1/h)            | k' (1/h)             | k' (1/h)          | Slope                                                                                | R <sup>2</sup> |
| a        | 22               | 4.3E-02           | 7.2E-02             | 8.3E-02              | 9.1E-02           | 0.72                                                                                 | 0.99           |
| b        | 22               | 2.4E-02           | 3.8E-02             | 5.2E-02              | 6.3E-02           | 0.47                                                                                 | 0.96           |
| c        | 22               | 3.1E-02           | 3.9E-02             | 5.0E-02              | 5.6E-02           | 0.62                                                                                 | 0.78           |
| a        | 55               | 1.9E-01           | 3.6E-01             | 4.3E-01              | 4.5E-01           | 0.70                                                                                 | 0.98           |
| b        | 55               | 2.4E-01           | 4.0E-01             | 4.3E-01              | 4.3E-01           | 0.75                                                                                 | 0.99           |
| c        | 55               | 1.5E-01           | 2.4E-01             | 3.0E-01              | 2.8E-01           | 0.77                                                                                 | 0.98           |

71  
 72  
 73

74 **Text S1.** Surface area calculations for the dog-bone pieces.

75

76 The total surface area of each dog-bone piece was calculated by first measuring its  
77 dimensions including the various heights (H: H1, H2, H3), lengths (L: L1, L2), and the width  
78 (W) of the dog-bone piece, as described by the figure below. All of these dimensions were  
79 measured with a ruler, except for the curved H2 value, which was measured by aligning a string  
80 to the curved side, marking on the string and then measuring the length of the marked string.  
81 After obtaining all of these dimensions, the total surface area was calculated by summing up the  
82 surface areas of different parts of the dog-bone piece. Most of the parts were rectangles and the  
83 area were calculated by multiplying the corresponding length by the width. An approximation  
84 was made when calculating the shaded part of the dog-bone piece (see Fig. 1 below), where the  
85 area was calculated assuming rectangle and trapezoid shapes.

86

87

88

89

90

91

92

93

94

95

96

97

98

99

100

101

102

103

104

105

106

107

108

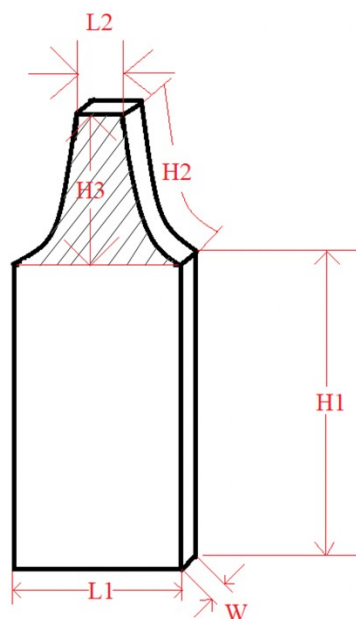

**Figure 1.** Dimensions of the dog-bone piece used to calculate the surface area.

109 **Text S2.** Description of the derivation of the analytical solution of the kinetic surface adsorption  
110 model.

111

112 An analytical solution was derived for the differential equation provided in eq. 6 from the  
113 main text, which represented how surface adsorption occurred over time through a kinetic  
114 adsorption model. This model was also adjusted to include a distribution coefficient ( $K_d$ ) instead  
115 of  $K_{eq}$ , since the sorption data in Fig. 3 did not reach equilibrium conditions. This equation was  
116 integrated using the integration factor method.<sup>1</sup> Two boundary conditions were used when  
117 integrating this equation and included: (1) at time = 0,  $C_{liquid} = C_{liquid,0} = \sim 50 \mu\text{g/L}$  and (2) at  
118 time = t,  $C_{liquid} = C_{liquid}$ . After integration, the solution for this equation is provided below (eq.  
119 S1):

120 
$$C_{liquid} = C_{liquid,0} \cdot e^{-\alpha \cdot t} + \frac{\beta}{\alpha} \cdot (1 - e^{-\alpha \cdot t})$$
 where  $\alpha = \frac{k' \cdot V_{liquid}}{M_{PEX} \cdot K_d} + k'$  (S1)

121

$$\text{where } \beta = \frac{k' \cdot M_{Total}}{M_{PEX} \cdot K_d}$$

122

123 **References**

124 1 J. L. Schnoor, *Environmental Modeling: Fate and Transport of Pollutants in Water, Air,*  
125 *and Soil*, Wiley-Interscience, New York, NY, 1996.

126
